# Supplementary material
Source: MDPI journal article supplement (https://www.mdpi.com/2071-1050/15/11/8691)
Supplement: s1 [file s1]

Table S1. Description of the variables for Socio-demographic and physiographic features.

| <b>Sl. No.</b> | <b>Variables/Set of variables</b>              | <b>Descriptions</b>                                                                                                                                                                       |
|----------------|------------------------------------------------|-------------------------------------------------------------------------------------------------------------------------------------------------------------------------------------------|
| 1.             | Age                                            | Whether more than 60 years or 40 to 60 years or below 40 years                                                                                                                            |
| 2.             | Occupation                                     | About the primary and secondary occupation<br>Which sector contributes the highest total income by the family of the respondents in a year<br>Percentage of people engaged in agriculture |
| 3.             | Education                                      | Whether it passed the secondary (10 <sup>th</sup> Standard) or dropped-out school before the secondary examination                                                                        |
| 4.             | Caste                                          | Whether SC or ST or others                                                                                                                                                                |
| 5.             | Family size and type                           | How many members are there in a farm family<br>Whether the families are nuclear or joint                                                                                                  |
| 6.             | The fertility of soil perceived by farmers     | Farmer's perception of the soil condition (fertile or infertile or medium fertile) derived from previous cropping seasons                                                                 |
| 7.             | Landholding                                    | The total land area of a household along with the total cultivable land area<br>Whether owned land or leased-in land                                                                      |
| 8.             | Availability of irrigation                     | Whether irrigated or rainfed lands                                                                                                                                                        |
| 9.             | Soil testing and soil fertility                | Whether soil testing was done or not<br>Perception of farmers about soil fertility                                                                                                        |
| 10.            | Participation of women in different activities | Perception about women's participation in farming and household activities                                                                                                                |

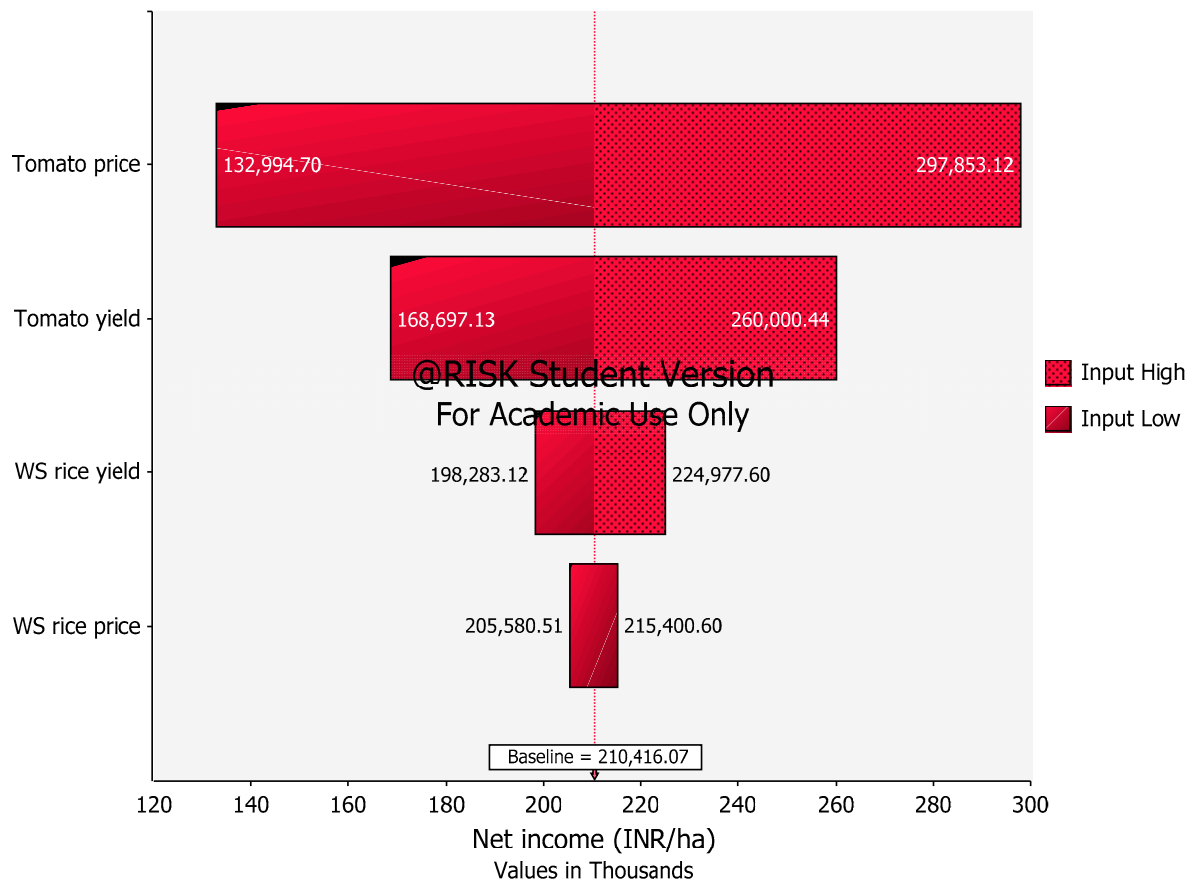

Figure S1. Input Ranked by Effect on Output Mean of Rice-Tomato cropping system.

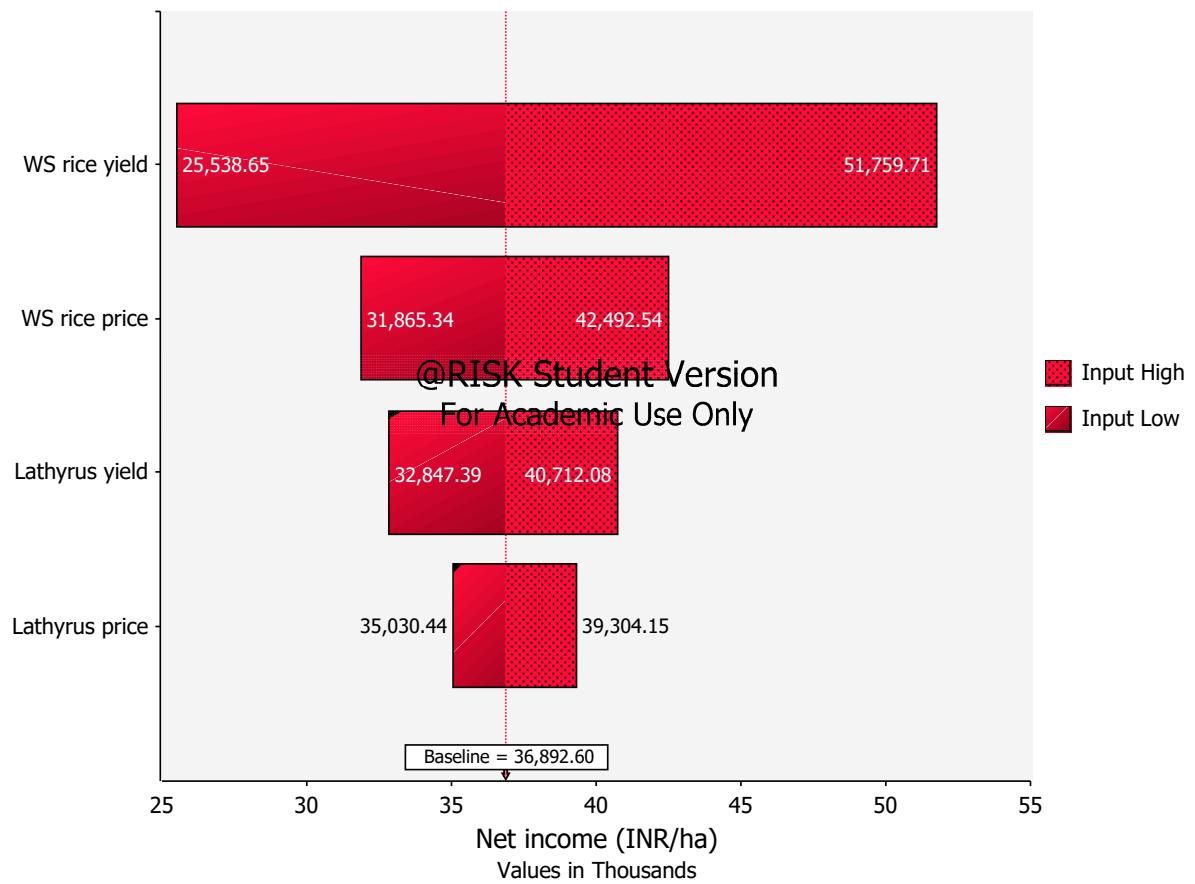

Figure S2. Input Ranked by the effect on Output Mean of Rice-Lathyrus cropping system.

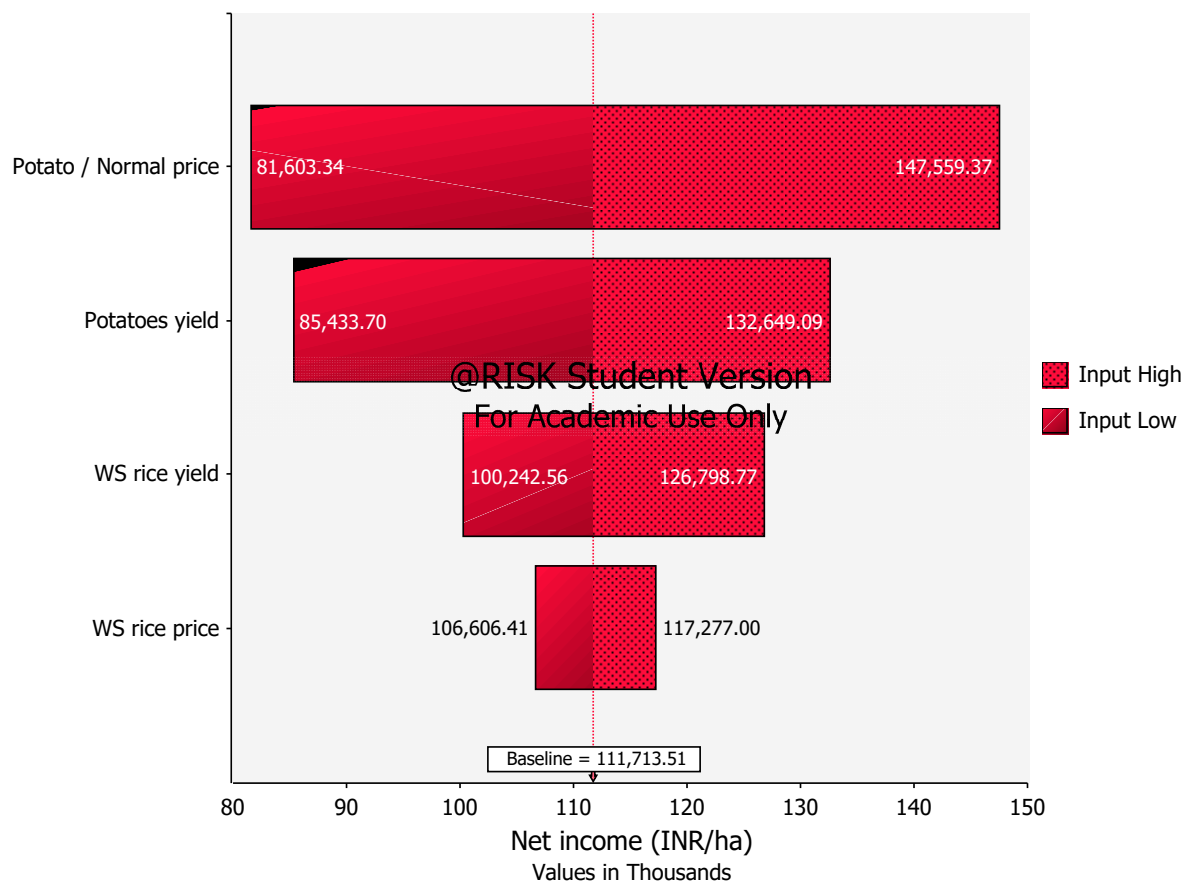

Figure S3. Input Ranked by the effect on Output Mean of Rice-Potato cropping system.

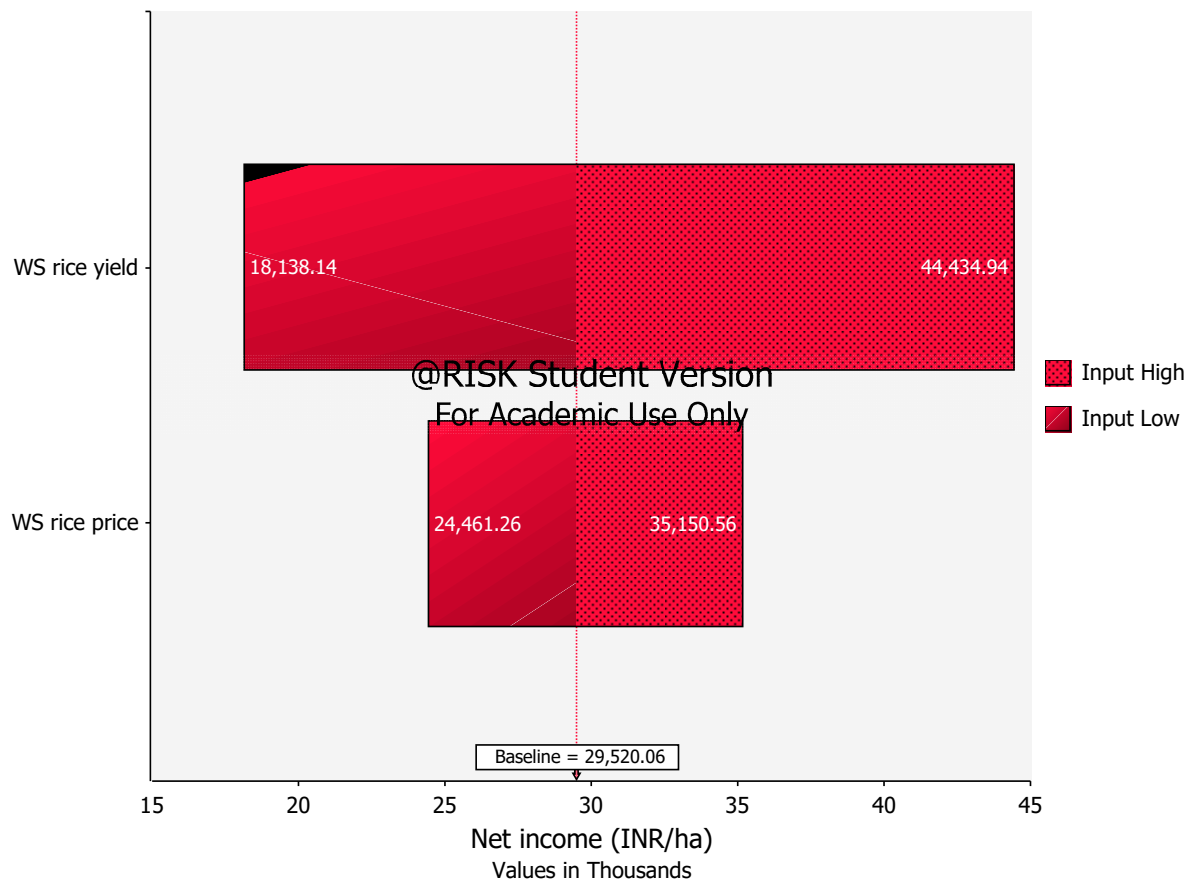

Figure S4. Input Ranked by Effect on Output Mean of Rice-Fallow cropping system.

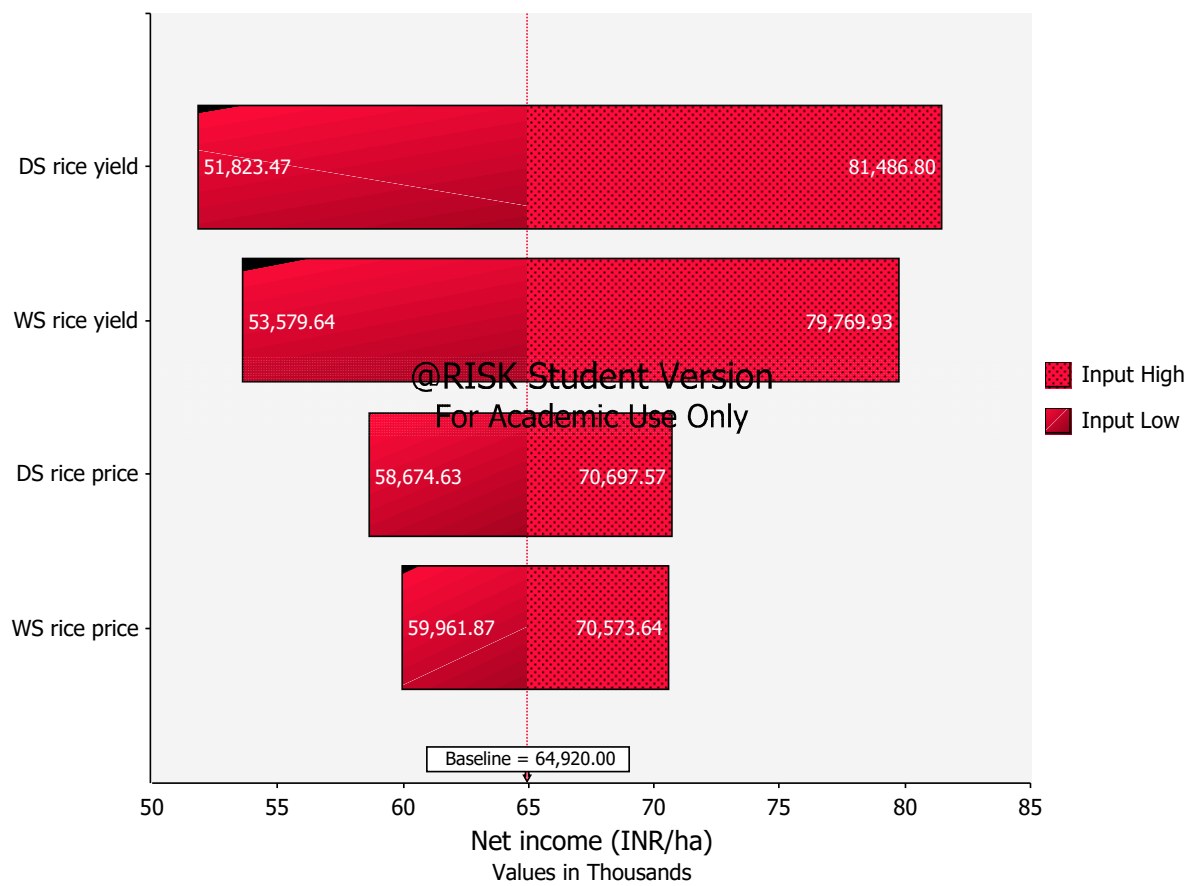

Figure S5. Input Ranked by Effect on Output Mean of Rice-Rice cropping system.

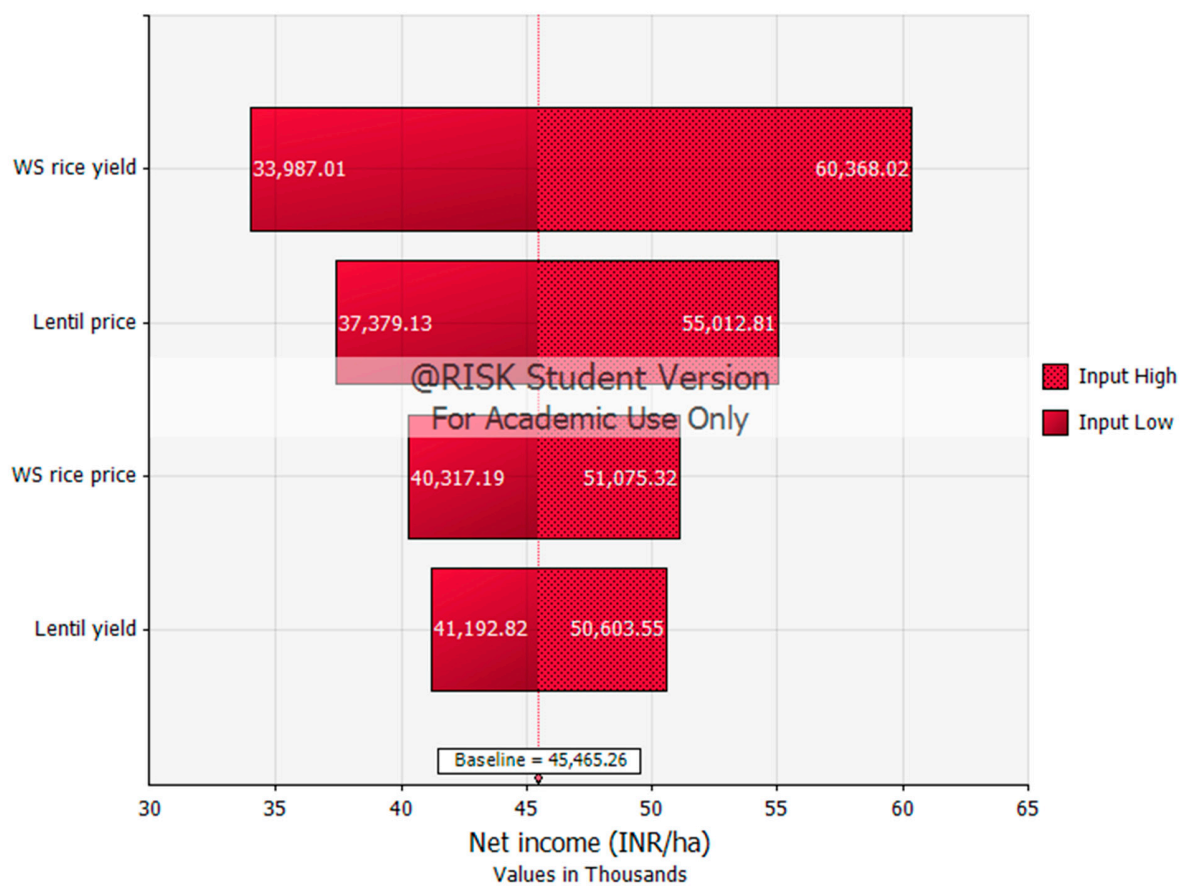

Figure S6. Input Ranked by Effect on Output Mean of Rice-Lentil cropping system.

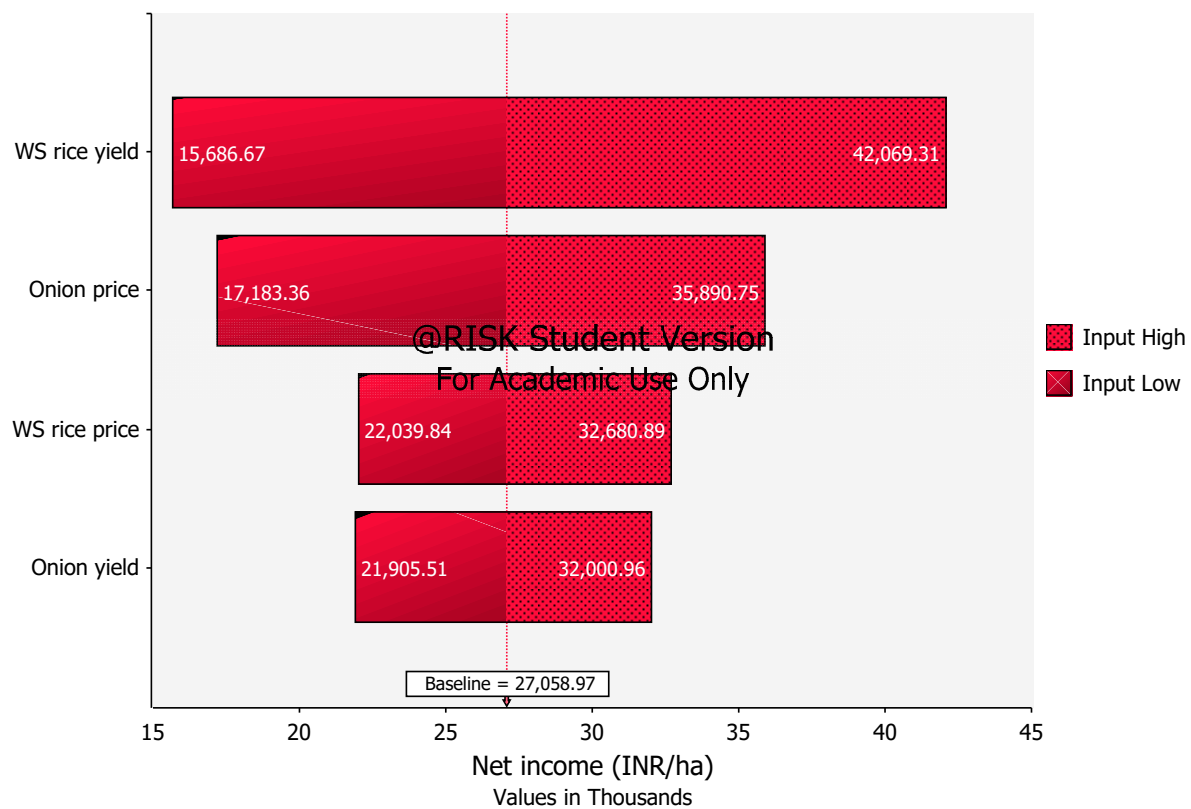

Figure S7. Input Ranked by effect on Output Mean of Rice-Onion cropping system.



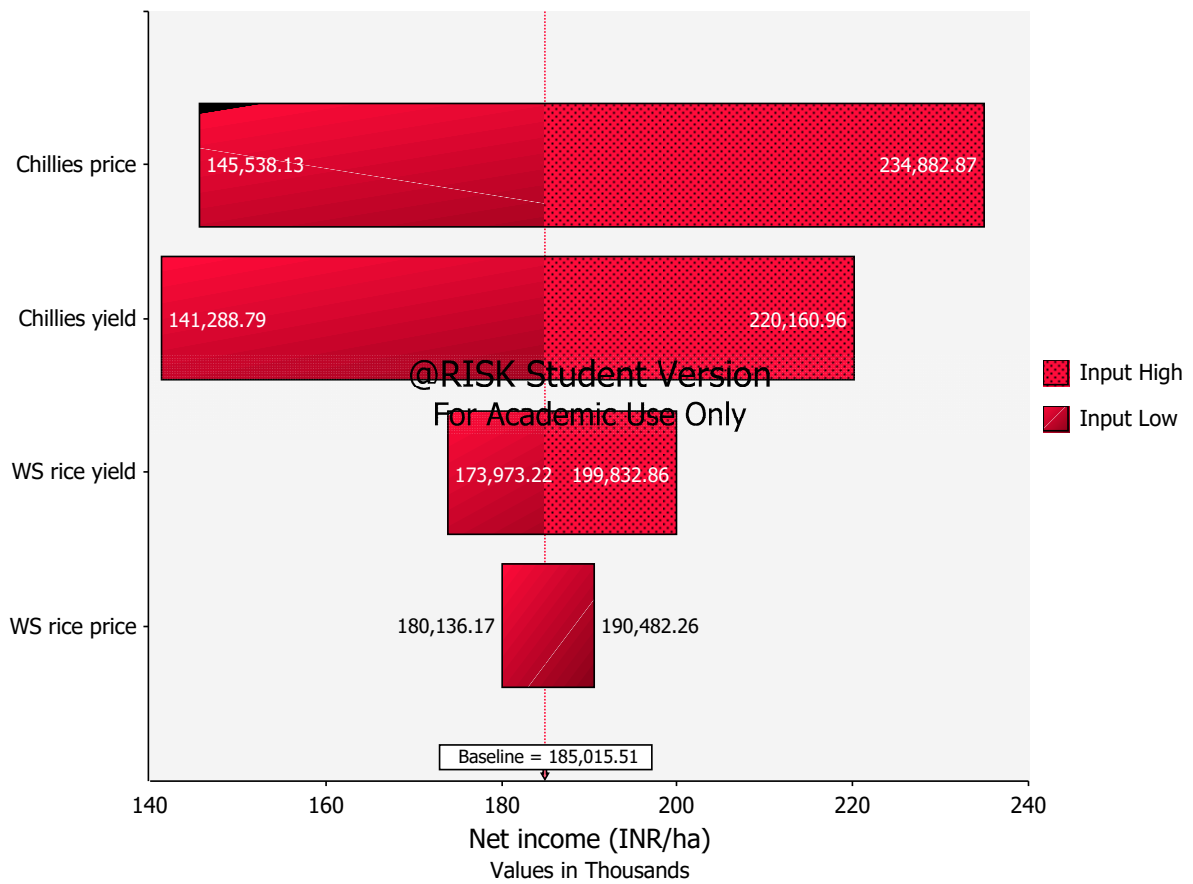

Figure S8. Input Ranked by effect on Output Mean of Rice-Chilli cropping system.

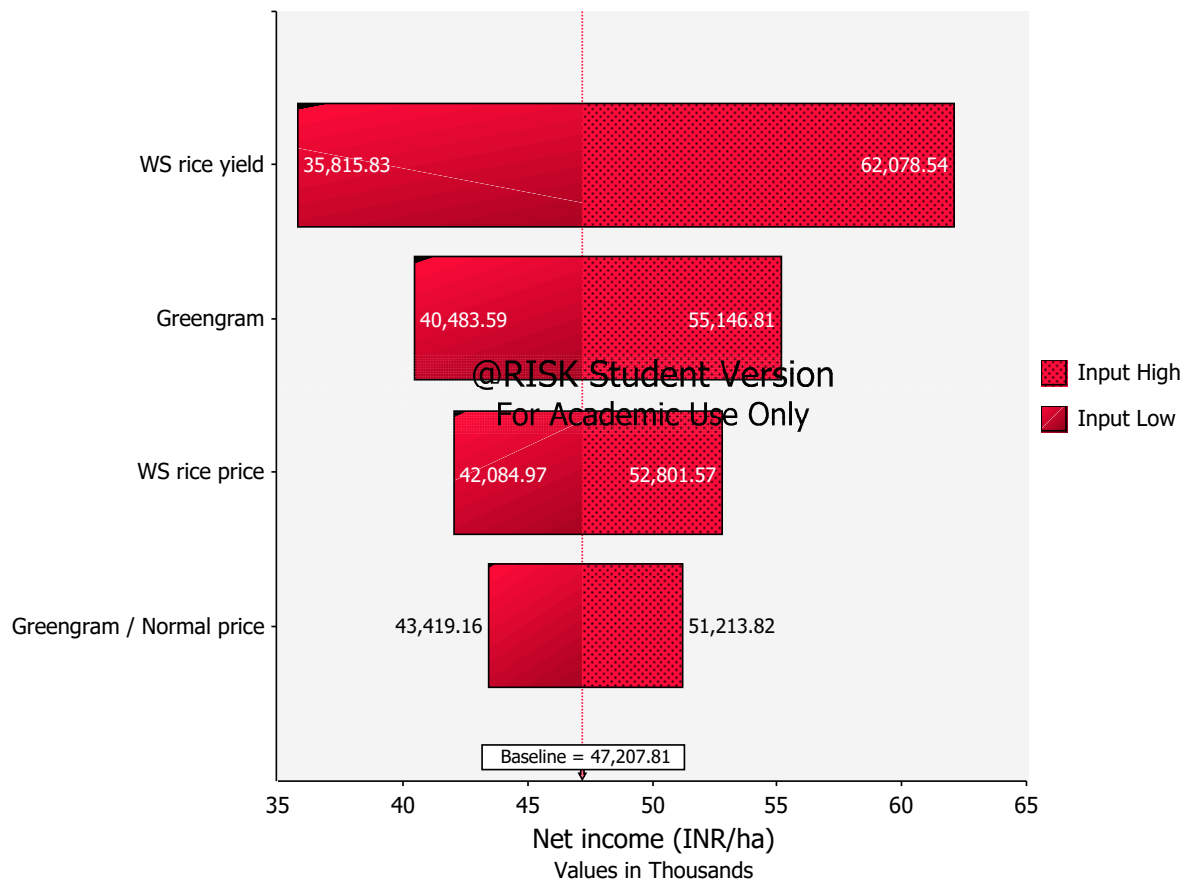

Figure S9. Input Ranked by effect on Output Mean of Rice-Fallow-Greengram cropping system.

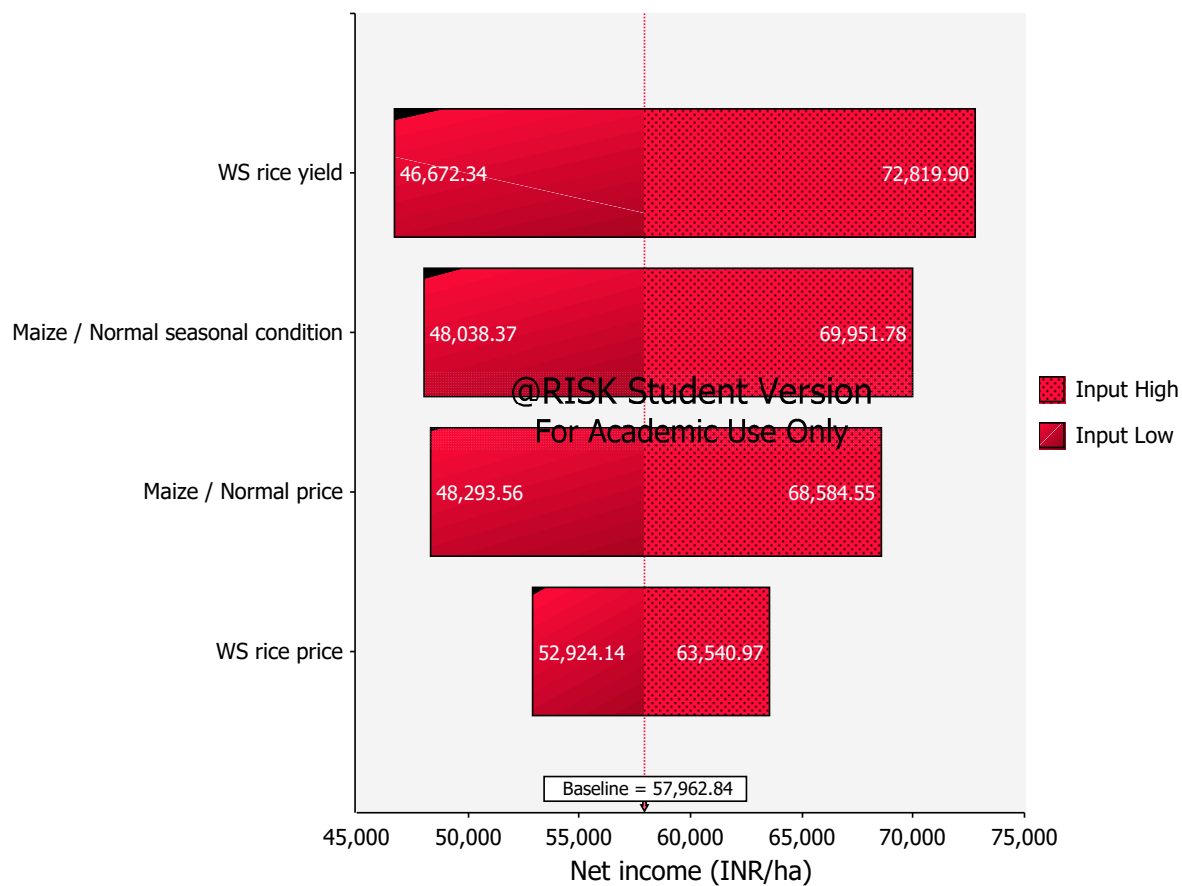

Figure S10. Input Ranked by effect on Output Mean of Rice-Maize cropping system.

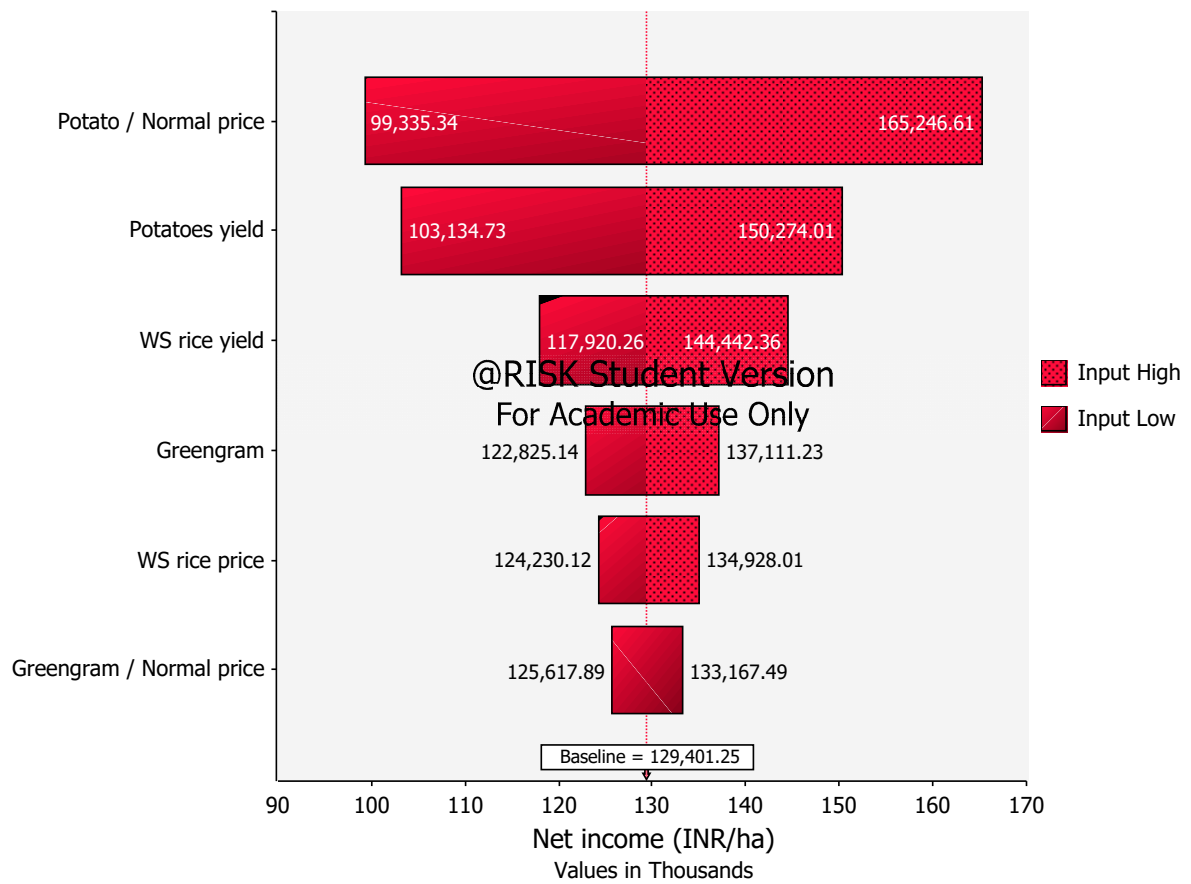

Figure S11. Input Ranked by effect on Output Mean of Rice-Potato-Greengram cropping system.
