# Supplementary material
Source: MDPI journal article supplement (https://www.mdpi.com/2071-1050/15/11/8691)
Supplement: s1 [file s1]

| Kharif                                                                                                                        | Rabi                                                                                                                               |
|-------------------------------------------------------------------------------------------------------------------------------|------------------------------------------------------------------------------------------------------------------------------------|
|  <p data-bbox="496 846 550 875">Rice</p>     |  <p data-bbox="1153 846 1208 875">Rice</p>       |
|  <p data-bbox="496 1339 550 1368">Rice</p>  |  <p data-bbox="1137 1339 1224 1368">Fallow</p>  |
|  <p data-bbox="496 1899 550 1930">Rice</p> |  <p data-bbox="1137 1899 1224 1930">Lentil</p> |



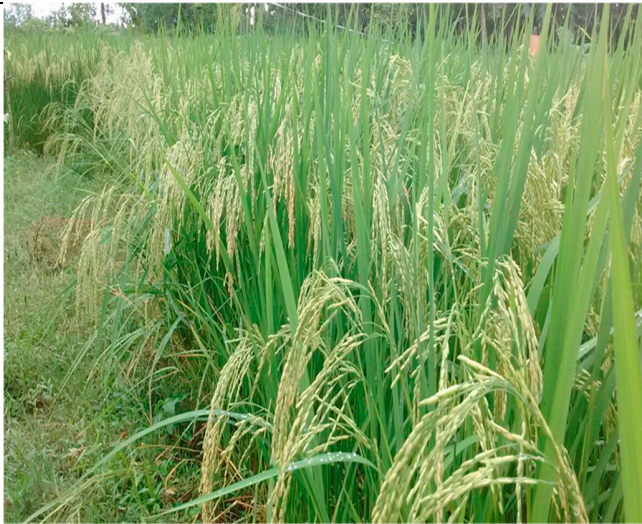

**Rice**

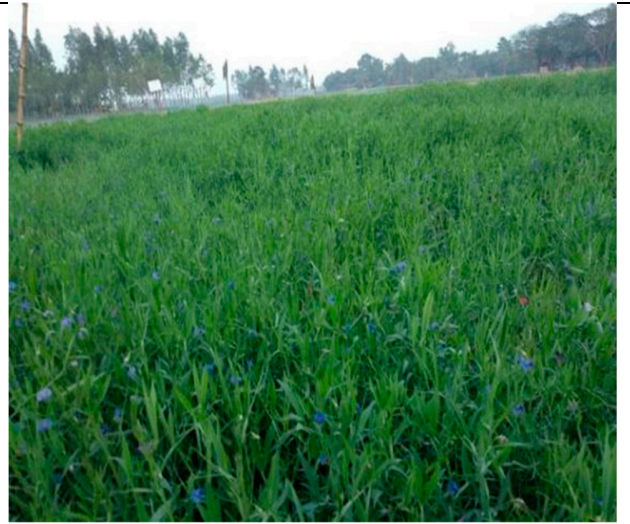

**Lathyrus**

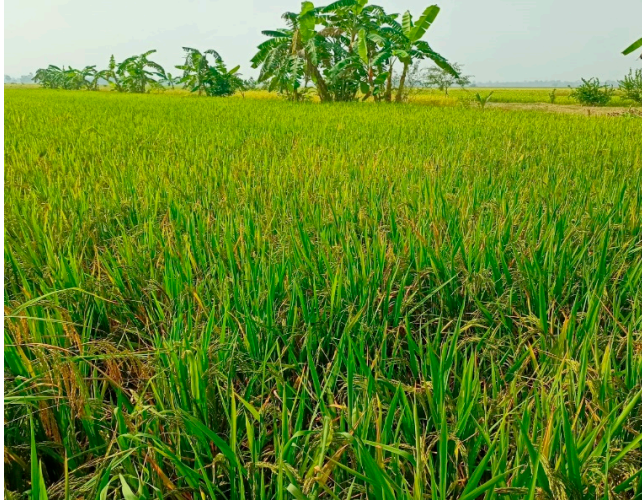

**Rice**

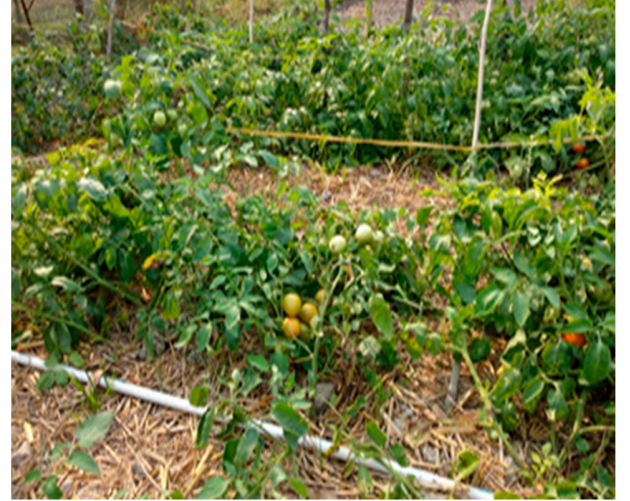

**Tomato**

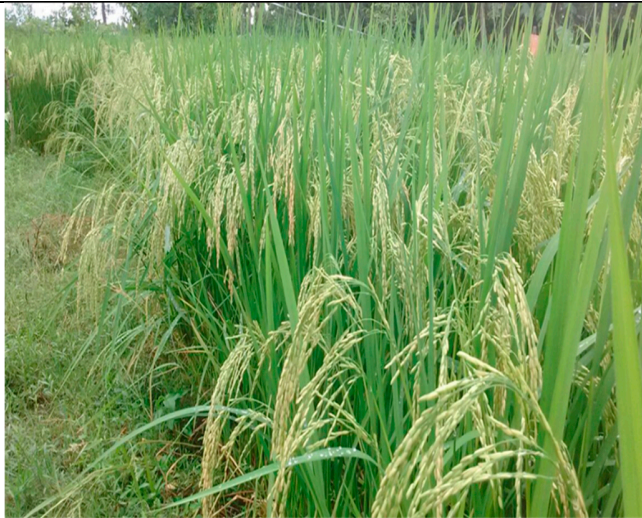

**Rice**

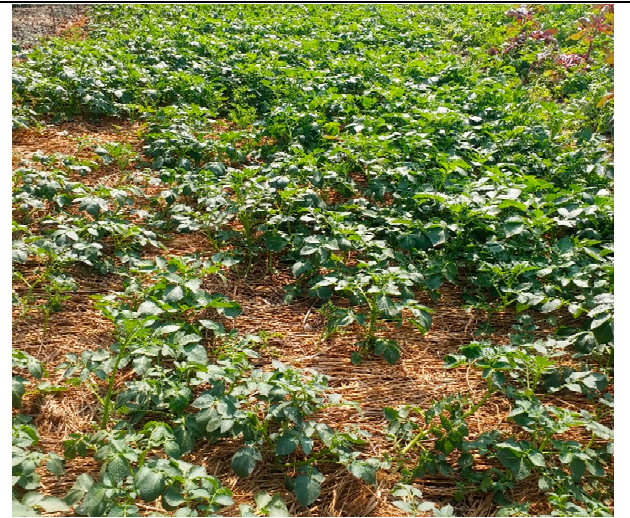

**Potato**



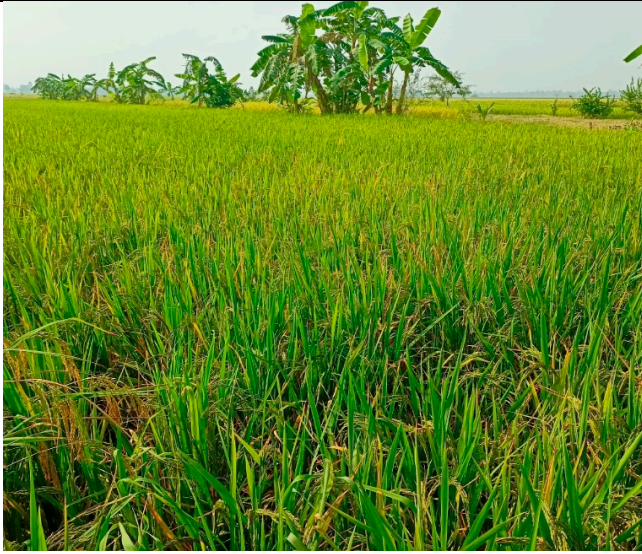

**Rice**

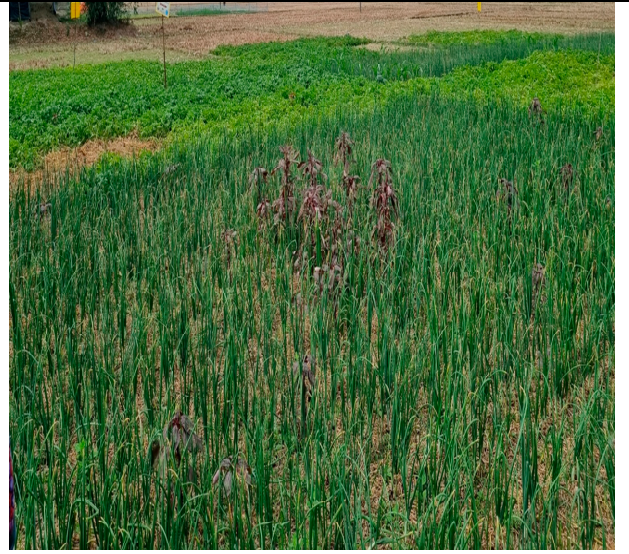

**Onion**

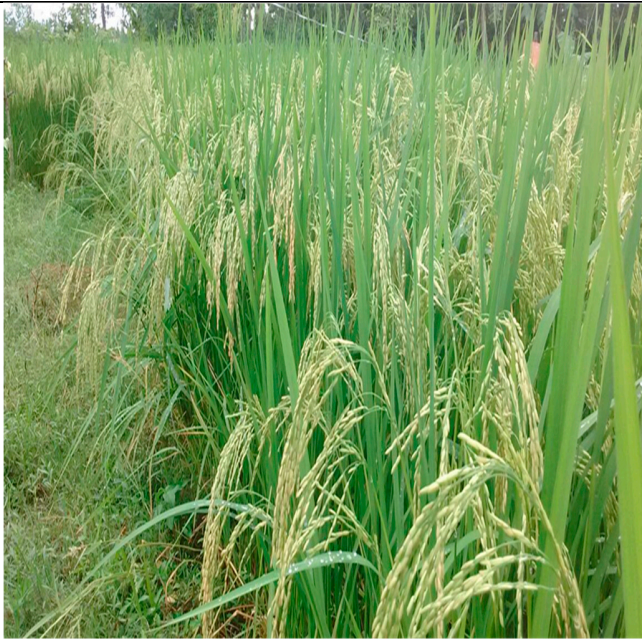

**Rice**

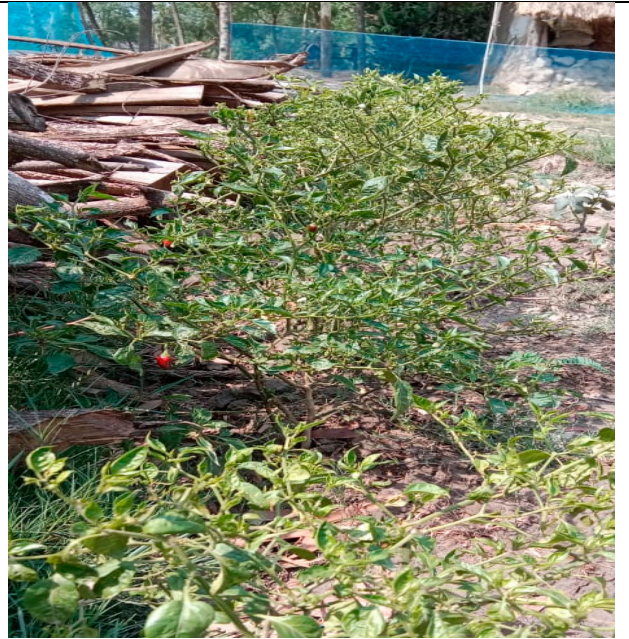

**Chilli**
